# Supplementary material for: Defect-related multicolour emissions in ZnO smoke: from violet, over green to yellow
Source: Royal Society of Chemistry journal article supplement (doi:10.1039/c8nr09998g), 2019-01-01
Supplement: c8nr09998g1.pdf [file c8nr09998g1.pdf]

## Electronic Supplementary Information for

### Defect-related multicolour emissions in ZnO tetrapods: from violet, over green to yellow

Miao Zhang<sup>1,2</sup> Frédéric Averseng<sup>1</sup>, Francia Haque<sup>2</sup>, Patrizia Borghetti<sup>2</sup>, Jean-Marc Krafft<sup>1</sup>, Benoît Baptiste<sup>3</sup>, Guylène Costentin<sup>1\*</sup> and Slavica Stankic<sup>2\*</sup>

<sup>1</sup>Sorbonne Université, CNRS, Laboratoire de Réactivité de Surface, LRS, F-75005 Paris, France

<sup>2</sup>Sorbonne Université, CNRS, Institut des NanoSciences de Paris, INSP, F-75005 Paris, France.

<sup>3</sup>Sorbonne Université, CNRS, Institut de Minéralogie, de Physique des Matériaux et de Cosmochimie, IMPMC, F-75005 Paris, France

\*Corresponding authors: [guylene.costentin@upmc.fr](mailto:guylene.costentin@upmc.fr) and [slavica.stankic@insp.jussieu.fr](mailto:slavica.stankic@insp.jussieu.fr)

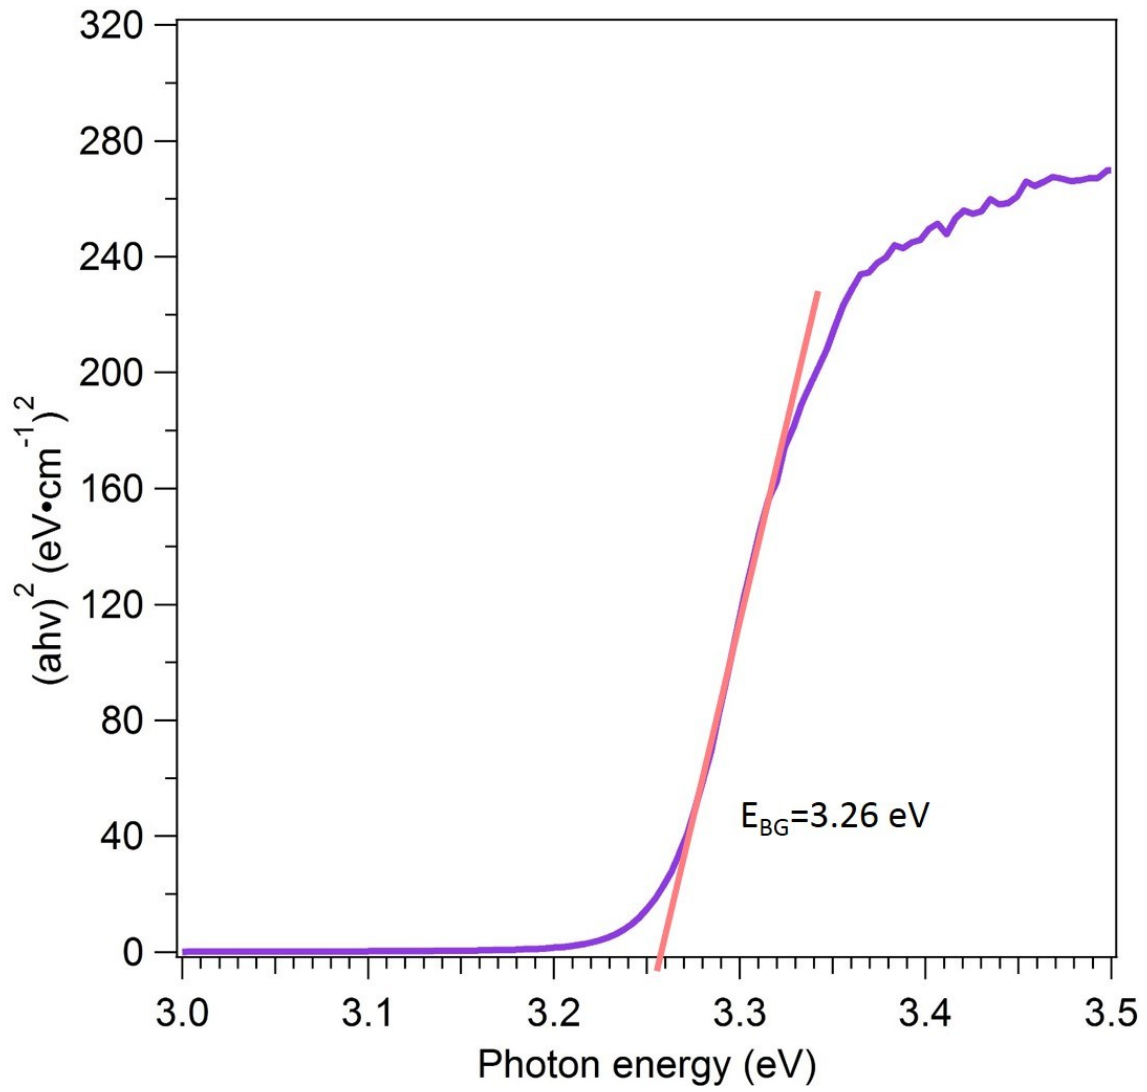

**Figure SI-1.** Tauc plot of as-synthesized ZnO smoke.

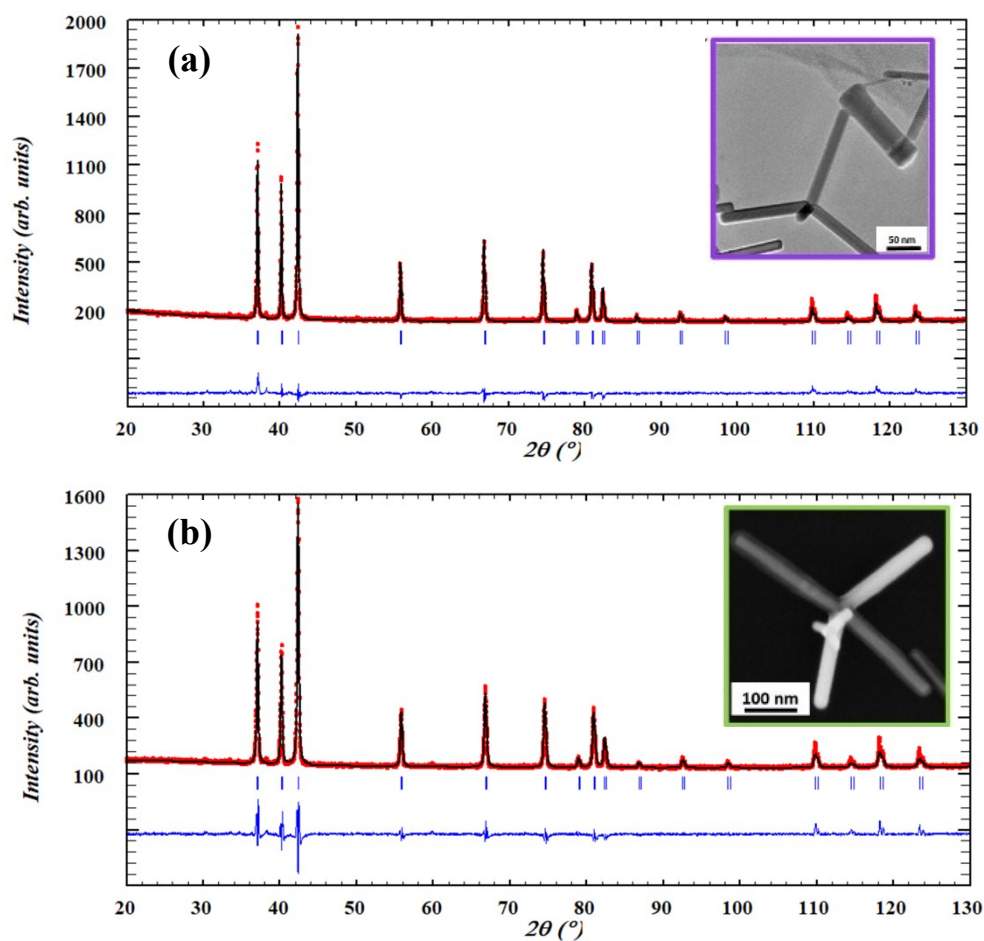

**Figure SI-2.** XRD and Rietveld refinements of the (a) as-synthesized and (b) annealed (773 K and  $P < 10^{-5}$  mbar) ZnO smoke. For both, the red crosses are the experimental points, the black line is the calculated pattern, blue vertical tick marks refer to Bragg reflections, and the blue line is the calculated difference pattern. The insets represent TEM and SEM images for as-synthesized and annealed sample, respectively.

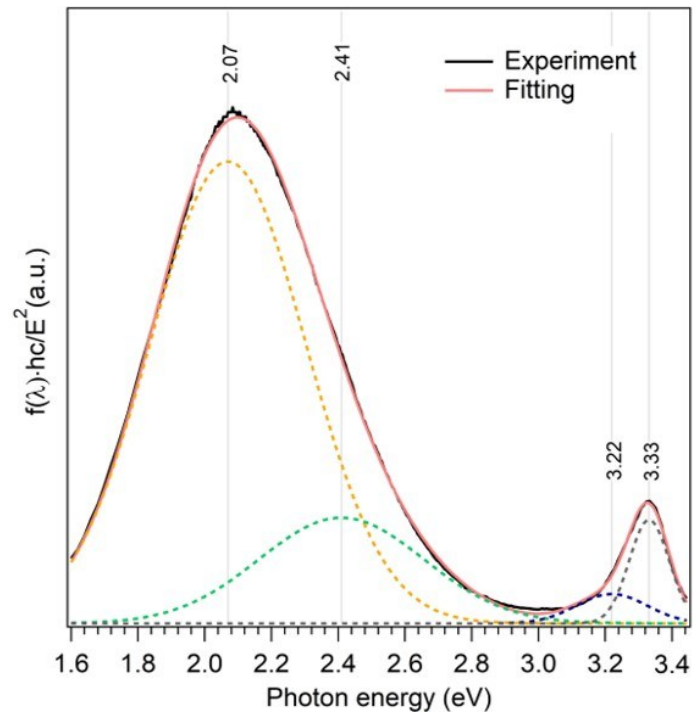

**Figure SI-3.** PL spectrum and corresponding band fitting analysis of ZnO sample three times annealed ( $T = 773$  K) in  $P_{O_2} = 100$  mbar.
